# Supplementary material for: N-acetylglucosamine-1-Phosphate Transferase Suppresses Lysosomal Hydrolases in Dysfunctional Osteoclasts: A Potential Mechanism for Vascular Calcification
Source: PubMed Central journal article supplement (PMC5753093; doi:10.3390/jcdd2020031), 2015-04-15
Supplement: jcdd-02-00031-s001.pdf [file jcdd-02-00031-s001.pdf]

# Supplemental Materials

**Table S1.** Taqman<sup>®</sup> probes used for real time PCR.

| Gene Symbol | Assay ID      | Gene Name                                                                   |
|-------------|---------------|-----------------------------------------------------------------------------|
| GAPDH       | Hs02758991_g1 | glyceraldehyde-3-phosphate dehydrogenase                                    |
| GNPTAB      | Hs00225647_m1 | <i>N</i> -acetylglucosamine-1-phosphate transferase, alpha and beta subunit |
| CTSK        | Hs00166156_m1 | cathepsin K                                                                 |
| ACP5        | Hs00356261_m1 | acid phosphatase 5, tartrate resistant; TRAP (Gene Aliases)                 |

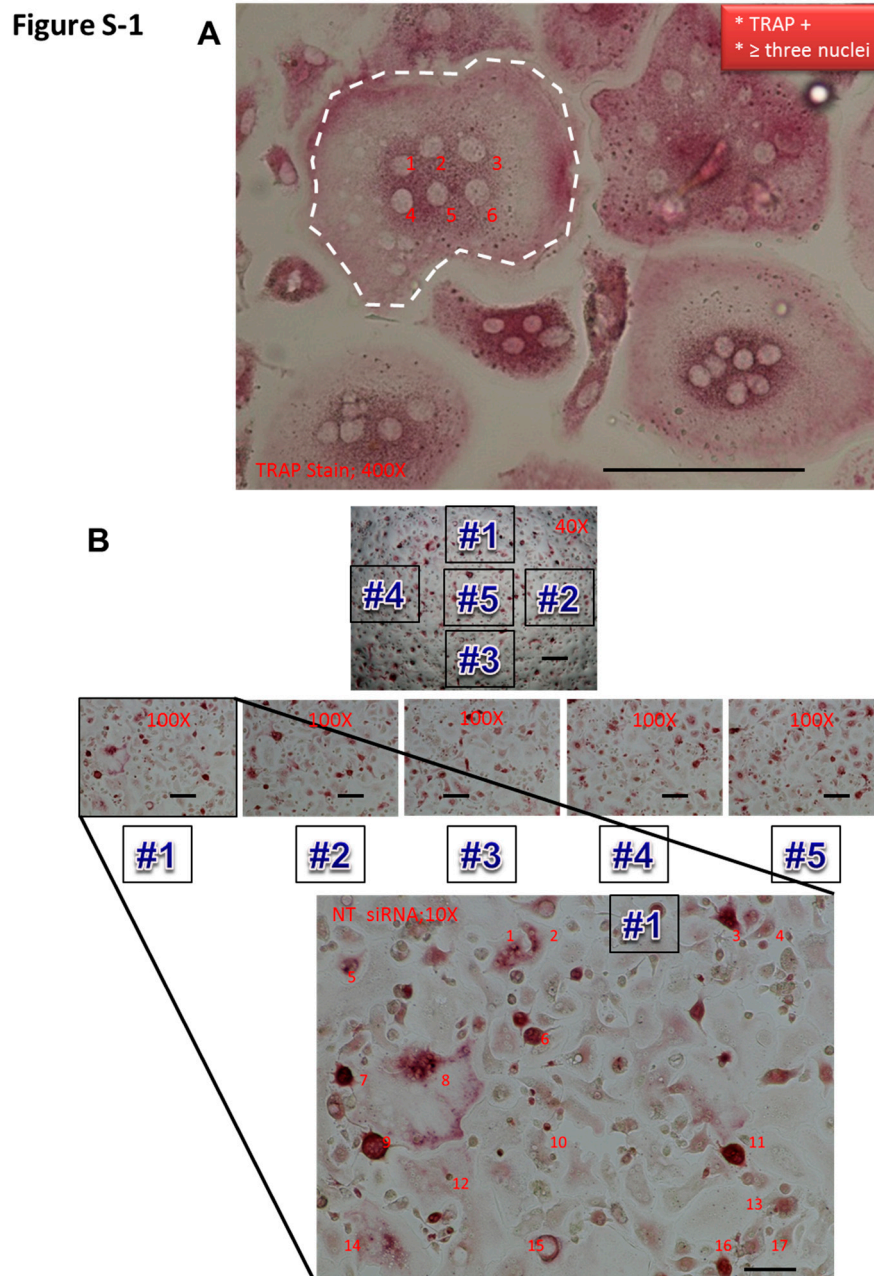

**Figure S1.** (A) A representative TRAP staining at high magnification (400X). TRAP-positive cells with at least three nuclei were counted as osteoclasts. For example, TRAP-positive cells traced by white dashed line had six nuclei and, therefore, have been counted as an osteoclast. Bars = 200  $\mu$ m; (B) Five random chosen areas were used to count osteoclasts followed by statistical analysis (100 $\times$  magnification). Bars = 400  $\mu$ m.

Figure S-2A

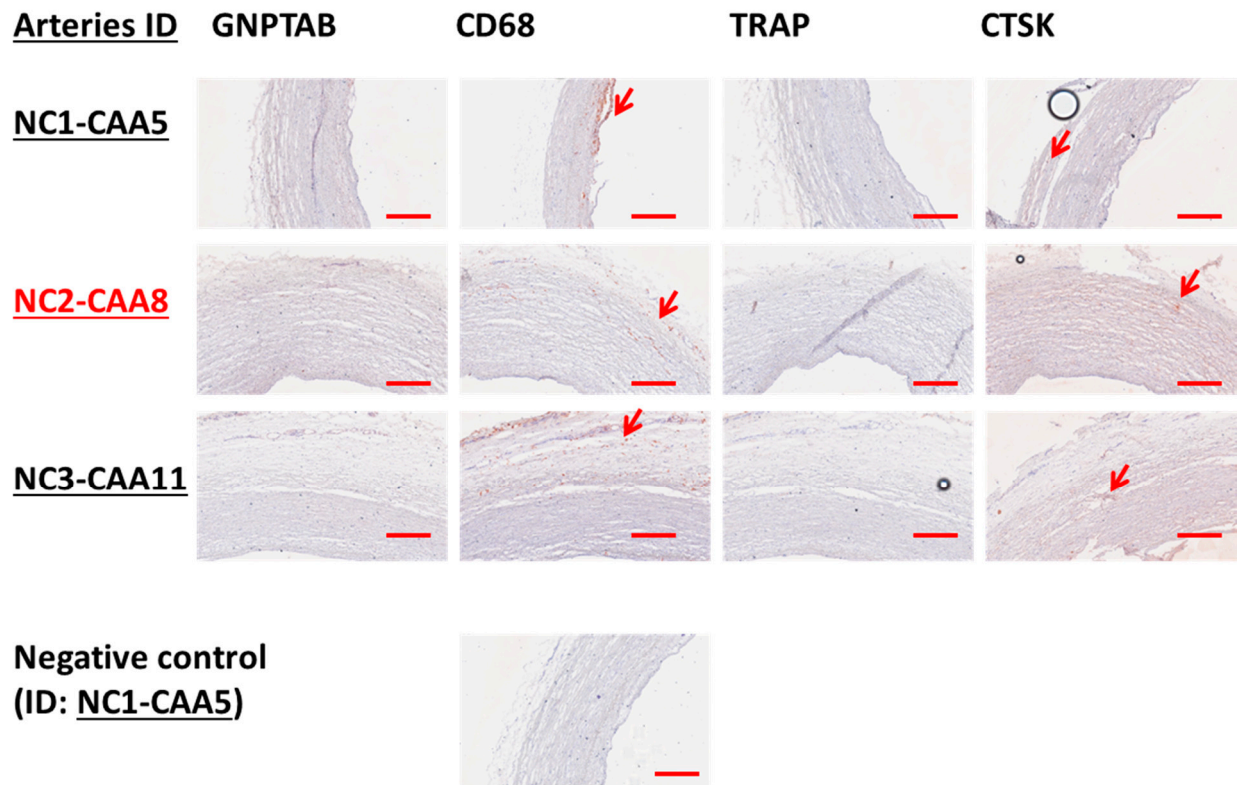

Figure S-2B

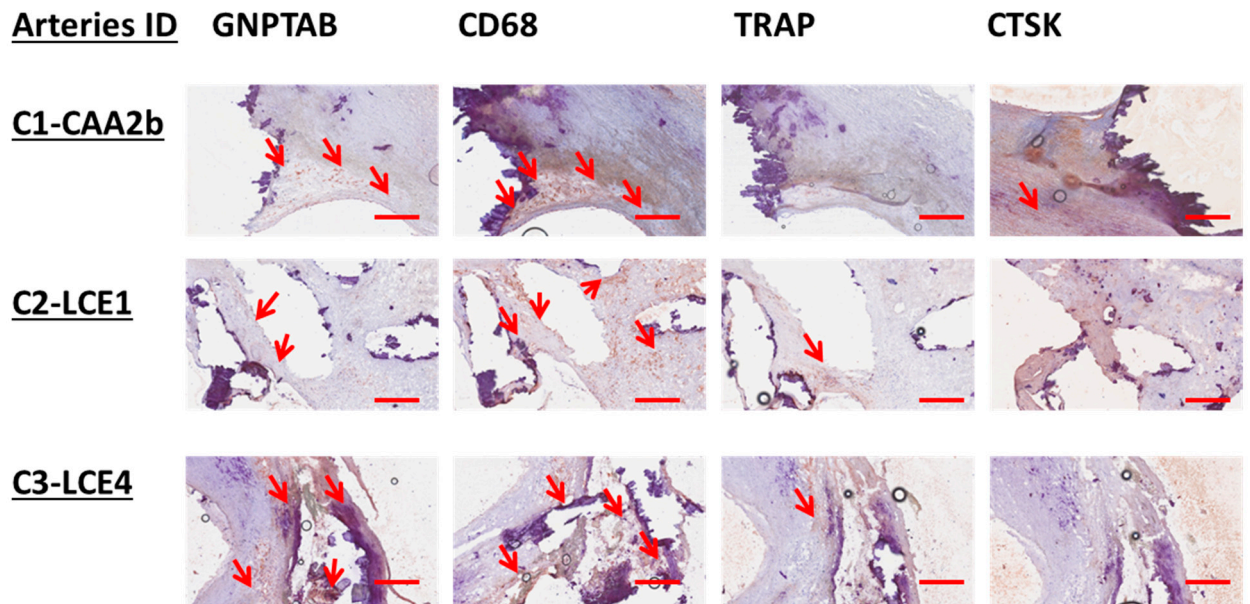Figure S2. *Cont.*

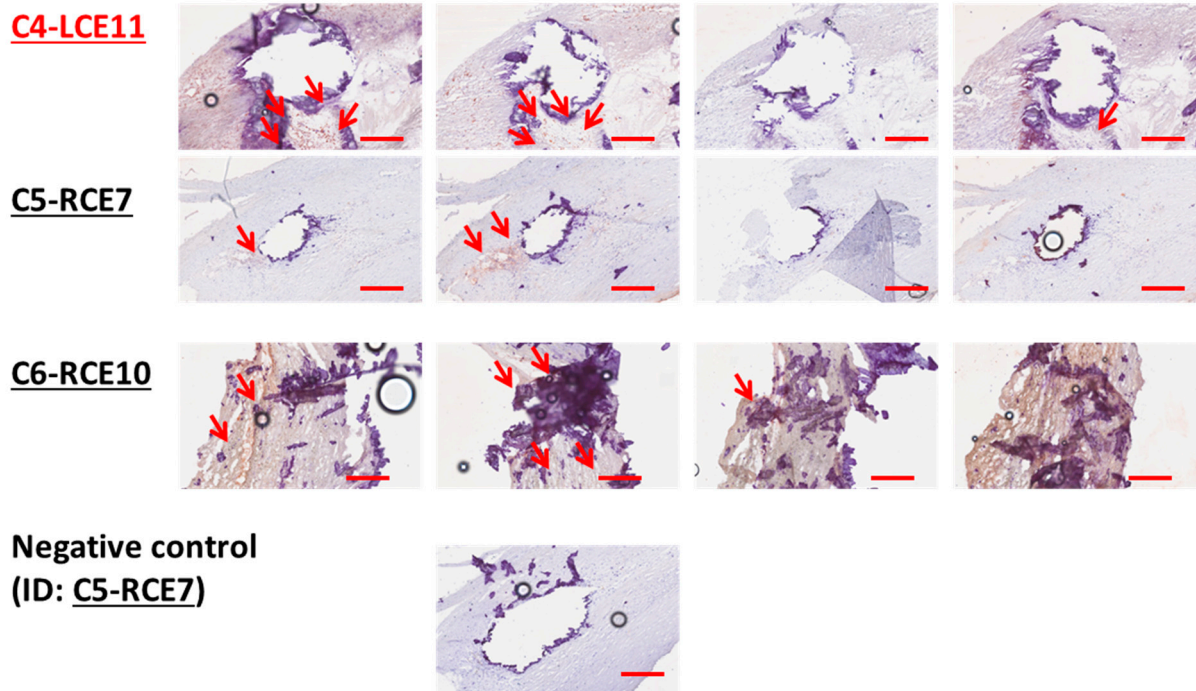

**Figure S2.** Representative immunohistochemistry images for GNPTAB, CD68, TRAP, and CTSK expression in non-calcified ( $n = 3$ ) and calcified ( $n = 6$ ) human arteries. Panel **A**: Non-calcified arteries; Panel **B**: Calcified arteries. ID: C: calcified; NC: non-calcified; CAA: carotid artery from autopsy specimens; LCE: left carotid artery from endarterectomy specimens; RCE: right carotid artery from endarterectomy specimens. Bar = 200  $\mu$ m

**Figure S-3A**

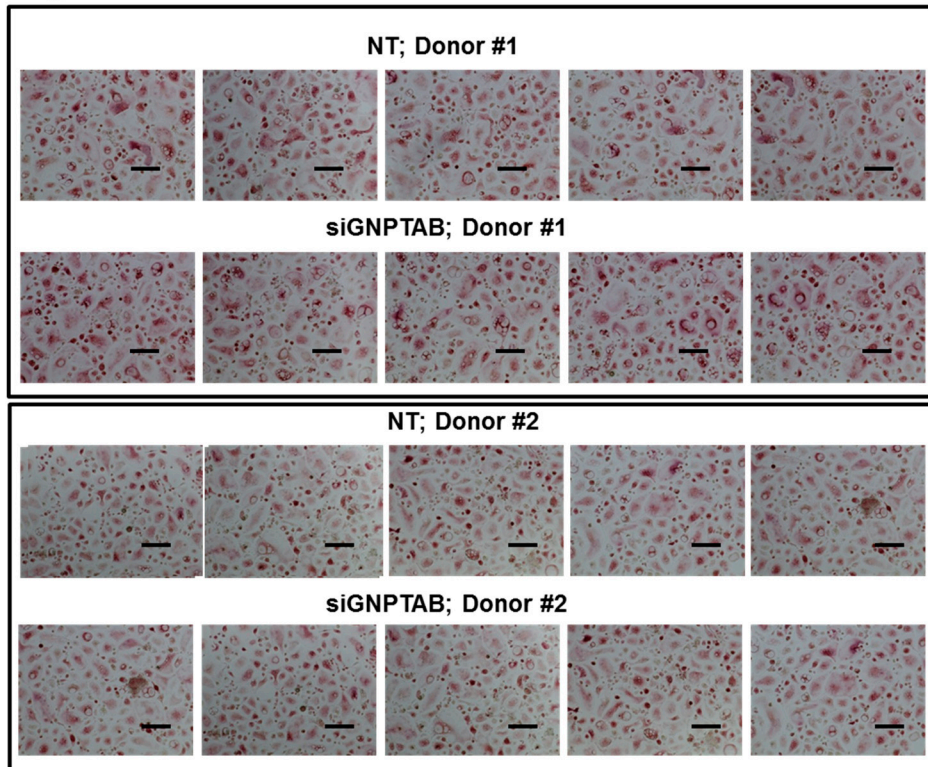

**Figure S3. Cont.**

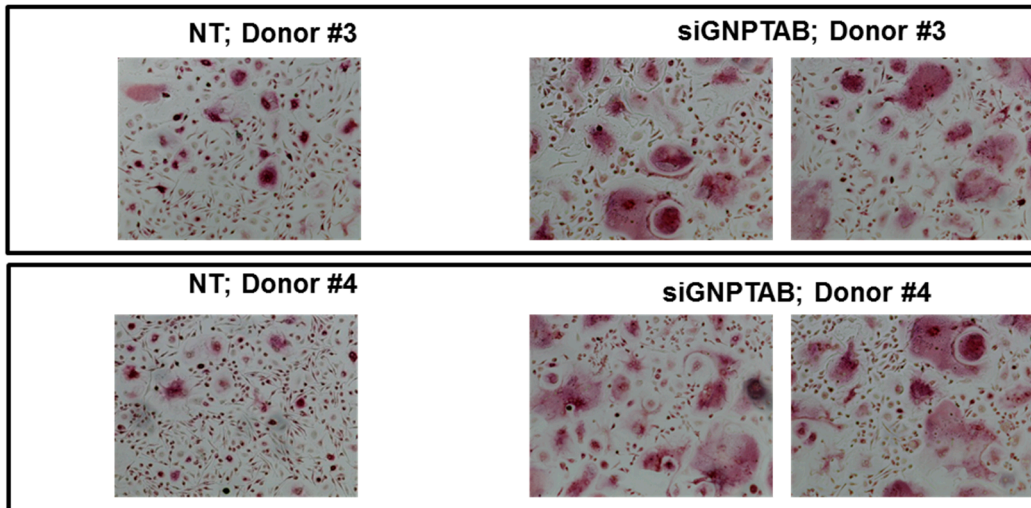

**Figure S-3B**

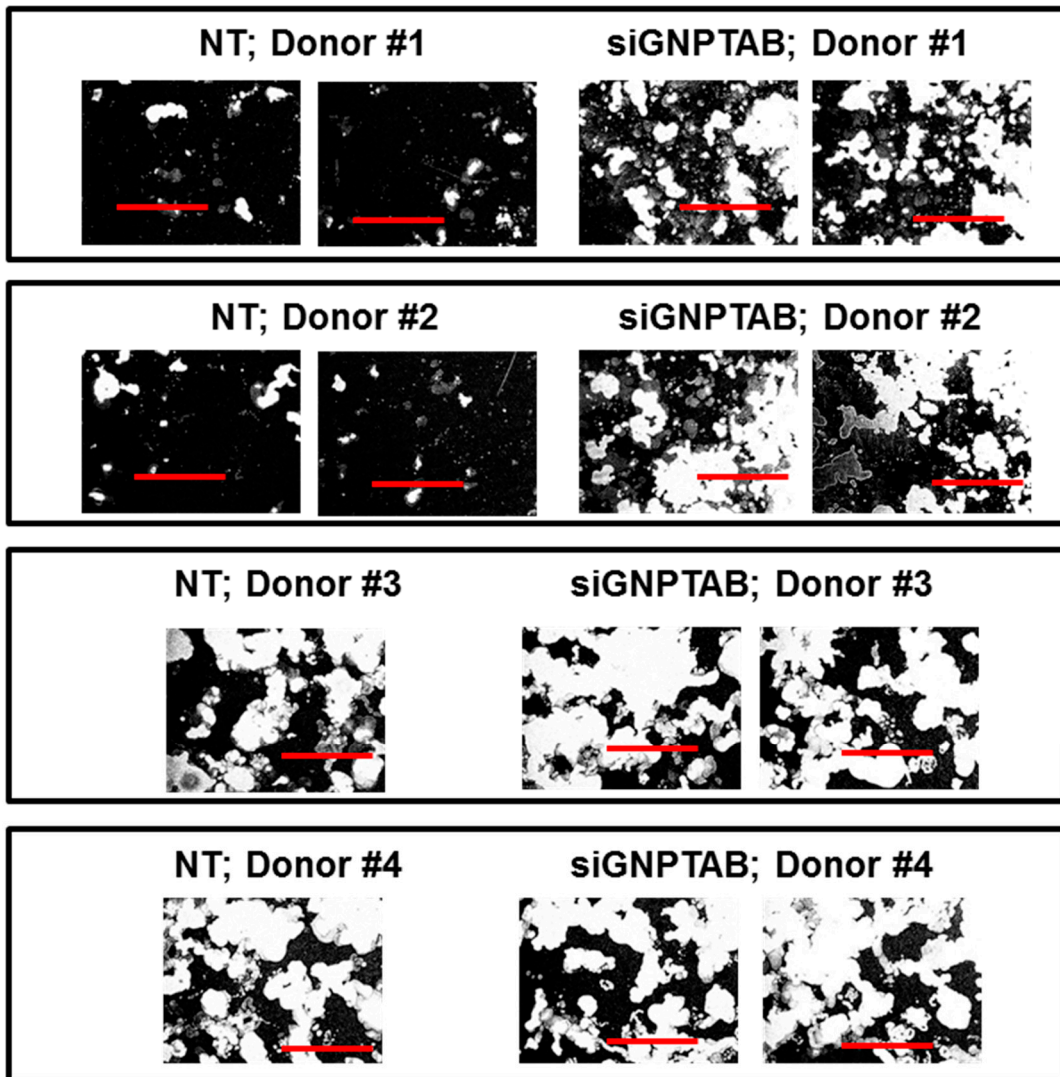

**Figure S3.** (A) Original images for TRAP staining from four donors. Bars = 400  $\mu$ m.  $n = 4$ ; two or five technical replicates each; (B) Original images for pit resorption areas from four donors. Bars = 50  $\mu$ m.  $n = 4$ ; one or two technical replicates each.

## Material and Methods for Osteoblast Differentiation Experiments

### (1) Cell culture

Human coronary artery smooth muscle cells (HCASMCs) were maintained in Smooth Muscle Cell Growth Medium 2 (Promocell), and were seeded in 48 well plates at  $0.35 \times 10^5$  cells/well or 24 well plates at  $0.75 \times 10^5$  cells/well. The next day, medium was changed to normal medium (NM) which was based on 10% FCS DMEM (Sigma) with 50 nM siRNAs using DharmaFECT 1 Transfection Reagent (GE Healthcare). After 3 days, the medium was changed to osteogenic medium (OM) which include 10 nM dexamethasone (Sigma), 10 mM  $\beta$ -glycerophosphate (Calbiochem) and 100  $\mu$ M ascorbic acid 2-phosphate (Sigma) (It's based on 10% FCS DMEM (Sigma)) with siRNAs. The efficiency of the knockdown was determined at the same time (Day0). The medium with siRNAs was changed each 3–4 days for 21 days.

### (2) Staining

For tissue non-specific alkaline phosphatase (TNAP) staining, HCASMCs were washed twice with PBS and stained with working BCIP/NBT Solution (Amresco) for 30 min at RT. HCASMCs were rinsed twice with water and observed the well-plates. For Alizarin Red staining, HCASMCs were fixed in 4% formalin for 15 min and washed twice with PBS. HCASMCs were stained with 2% Alizarin Red solution for 30 min at RT and rinsed twice with water and then well-plates were observed under the microscope.

### (3) TNAP activity assay

TNAP activity was determined using Alkaline Phosphatase Activity Colorimetric Assay Kit (BioVision) according to the manufacturer's instructions.

### (4) Calcium deposition assay

HCASMCs were washed with PBS and decalcified with 0.6 N HCl at 37 °C overnight. Calcium released from the cultured cell into the supernatant was measured by the Calcium Colorimetric Assay (BioVision), and total cellular protein was extracted by 0.1 N NaOH/0.1% SDS solution.

Figure S-4

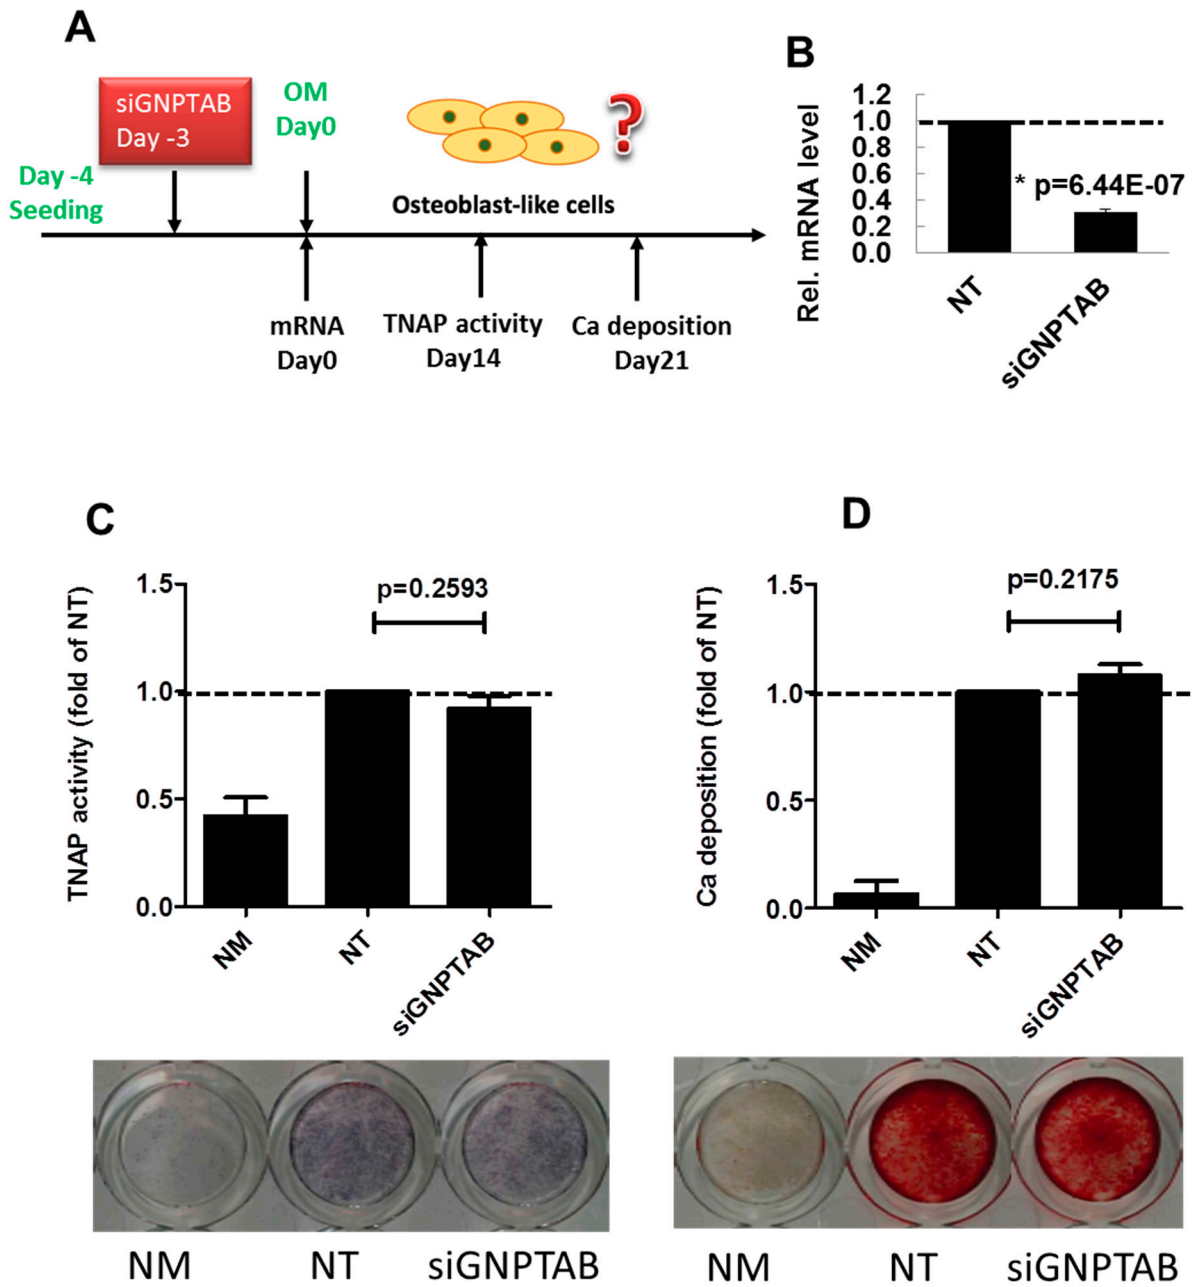

**Figure S4.** (A) Experimental design for siRNA experiments in SMC osteogenic model. (B) siRNA knockdown efficiency for siGNPTAB; (C) TNAP activity quantification and stain ( $n = 3$ ); (D) Calcium deposition quantification and stain ( $n = 3$ ).
